# Supplementary material for: Origin, transmission, diagnosis and management of coronavirus disease 2019 (COVID-19)
Source: PubMed Central journal article supplement (PMC10016932; doi:10.1136/postgradmedj-2020-138234), 2020-06-20
Supplement: postgradmedj-96-753-dc1-inline-supplementary-material-1.pdf [file postgradmedj-96-753-dc1-inline-supplementary-material-1.pdf]

## **Title page**

**Title of the article:** Origin, Transmission, Diagnosis and Management of Coronavirus Disease 2019 (COVID-19)

### **Corresponding author details:**

Dr Srikanth Umakanthan  
Department of Paraclinical Sciences  
Pathology Unit, Building #5, Room 30  
Faculty of Medical Sciences  
The University of the West Indies  
EWMSC, Mount Hope  
Email: [Srikanth.Umakanthan@sta.uwi.edu](mailto:Srikanth.Umakanthan@sta.uwi.edu)

### **Authors details:**

Srikanth Umakanthan, Department of Paraclinical Sciences, Faculty of Medical Sciences, The University of the West Indies, St. Augustine, Trinidad.

Pradeep Kumar Sahu, Department of Centre for Medical Sciences Education, Faculty of Medical Sciences, The University of the West Indies, St. Augustine, Trinidad.

Anu Ranade V, Department of Basic Medical Sciences, University of Sharjah, Sharjah, UAE

Bukelo, Maryann M, Department of Anatomical Pathology, Eric Williams Medical Sciences Complex, North Central Regional Health Authority, Trinidad.

Joseph Sushil R, MD, Department of Surgery, University of Minnesota, Minneapolis, Minnesota, USA

Lucas Faria Abrahao-Machado, Senior Pathologist, Department of Pathology, Botucatu, Sao Paulo, Brazil

Hari Kumar K, Department of International Public Health and Disease Surveillance, Midwest, Australia

Dhananjaya Narayana KV, Department of Radiology, Indragandhi Institute of Health Sciences, Bengaluru, Karnataka, India

Samarika Dahal, Department of Oral Pathology, Institute of Medicine, Maharajgunj, Kathmandu, Nepal

**Word counts: text(excluding abstract and references):** 2291 words

**Source of support:** No grants received.

**Acknowledgement:** NIL

**Conflict of Interest:** The contributors declare no conflict of interest.
